# Supplementary material for: TDP1 deficiency sensitizes human cells to base damage via distinct topoisomerase I and PARP mechanisms with potential applications for cancer therapy
Source: PubMed Central journal article supplement (PMC3950670; doi:10.1093/nar/gkt1260), 2013-12-12
Supplement: supp_gkt1260_nar-01684-d-2013-File011.pdf [file supp_gkt1260_nar-01684-d-2013-File011.pdf]

# Supplementary Figure 1

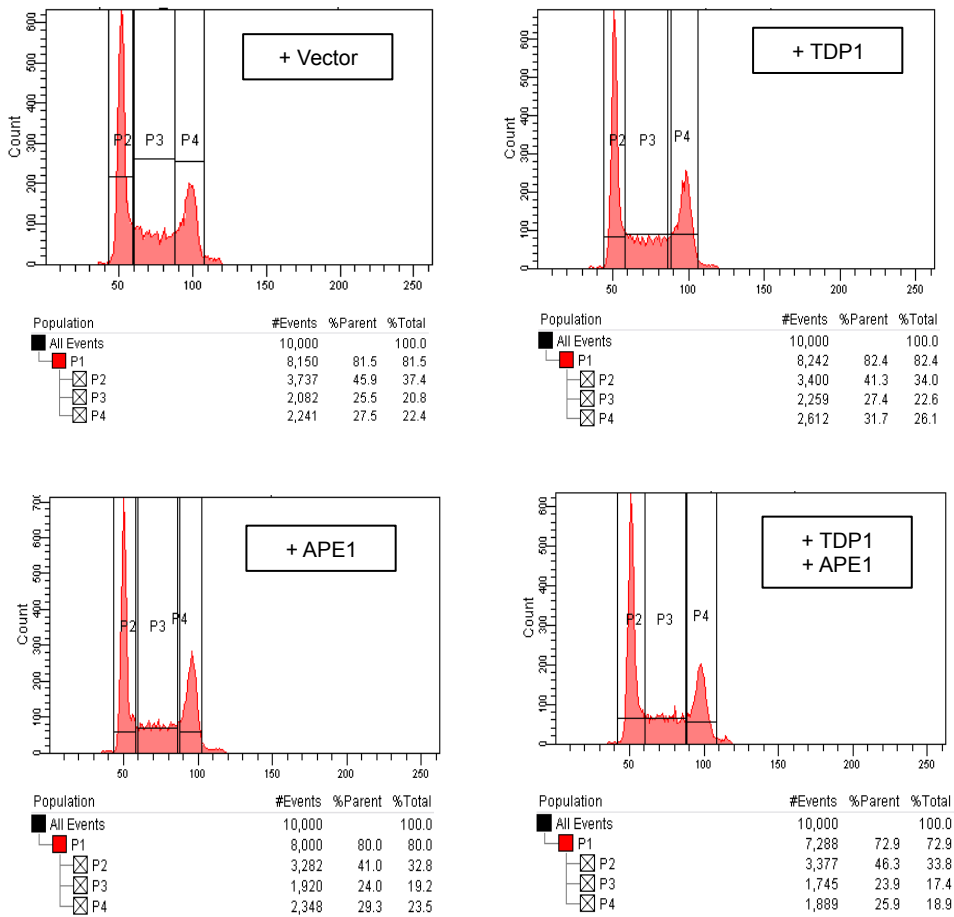

**Suppl Fig.1. Overexpression of TDP1 or APE1 did not affect the cell cycle profile.** MRC5 cells were transfected with empty vector, Flag-APE1, Myc-TDP1, or both. Cells were fixed in 70% ethanol at 4°C overnight and stained with 10 µg/ml propidium iodide and 0.5 mg/ml RNase in PBS for 30 min. Cell cycle profile was determined using FACScan (Beckmann Coulter).
